# Supplementary material
Source: bioRxiv or medRxiv preprint supplement (https://www.medrxiv.org/highwire/filestream/76692/field_highwire_adjunct_files/0/2020.03.26.20044081-1.pdf)
Supplement: Supplementary file [file 2020.03.26.20044081-1.pdf]

# Effect of contact lock on CoVid-19 infection rate

Walter Langel, Institut für Biochemie, Universität Greifswald

Supplementary material to

## Extrapolation of Infection Data for the CoVid-19 Virus and Estimate of the Pandemic Time Scale,

The extrapolation of the total infection data in Germany taken till march 21<sup>st</sup> before the contact lock predicted a total number of 338 000 cases. Data starting from march 21<sup>st</sup> till April 12<sup>th</sup> are extrapolated to a total of 184 000. This suggests that the contact lock will result in a reduction of infections to about 55% with respect to the situation before.

## Logarithmic plot: Direct visualization of the effect of contact lock

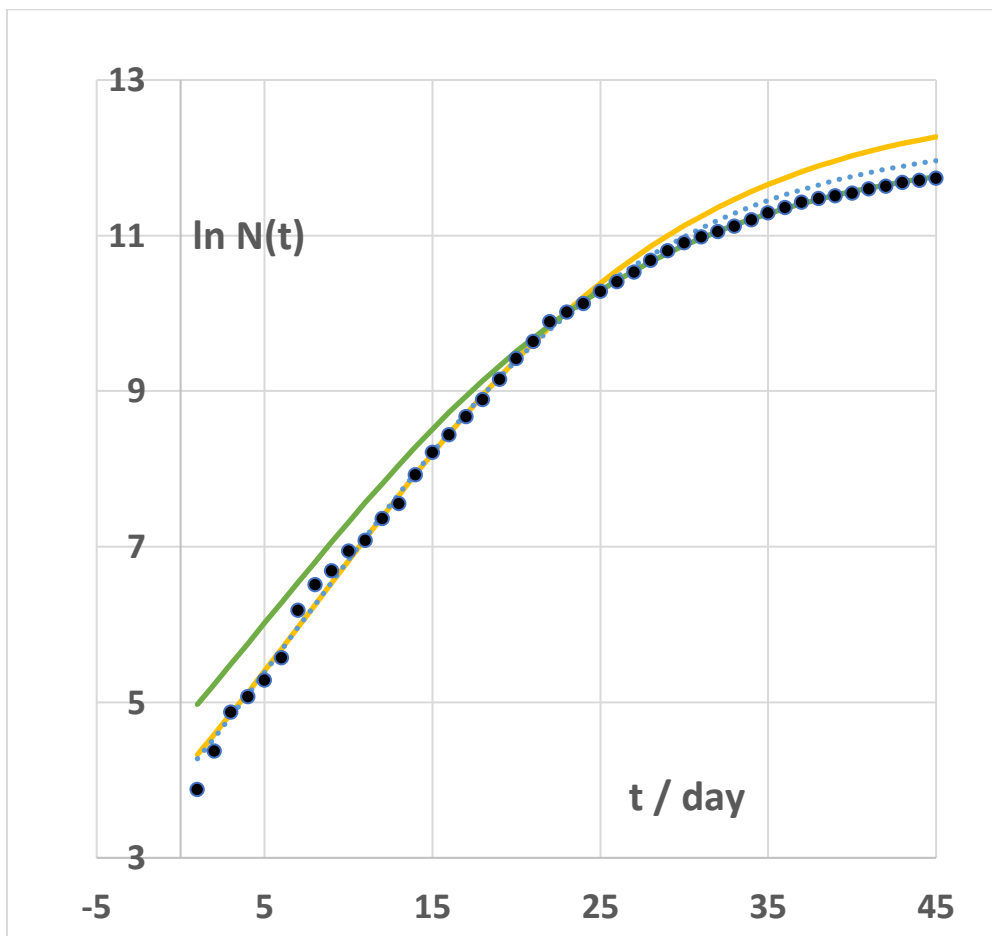

*Black circles:*

**Figure 1: Logarithmic plot of total confirmed infections in Germany:**

*Black circles:* Confirmed number of total infections [1] from February 28<sup>th</sup> till April 12<sup>th</sup>,

*Full lines:* Fits and extrapolations according to the main text [1]:

*orange:* before contact lock (February 28<sup>th</sup> till march 21<sup>st</sup>),

*green*: after contact lock (March 21<sup>st</sup> till April 12<sup>th</sup> )

*Dotted blue line*: data for February 28<sup>th</sup> till March 23<sup>rd</sup> from [2] as used in [1] (cf. Table 1).

Around March 21<sup>st</sup> the observed data in **Figure 1** clearly bend towards a smaller increase. This influence is ascribed to the contact lock. Both periods before and after it obviously cannot be described by the same fit parameters (**Table 1**). Here the orange and the green curves with higher and smaller slopes fit the periods without and with contact lock, respectively. (The originally published fit [1] for the data until March 23<sup>rd</sup> showed already a significant influence of the contact lock).

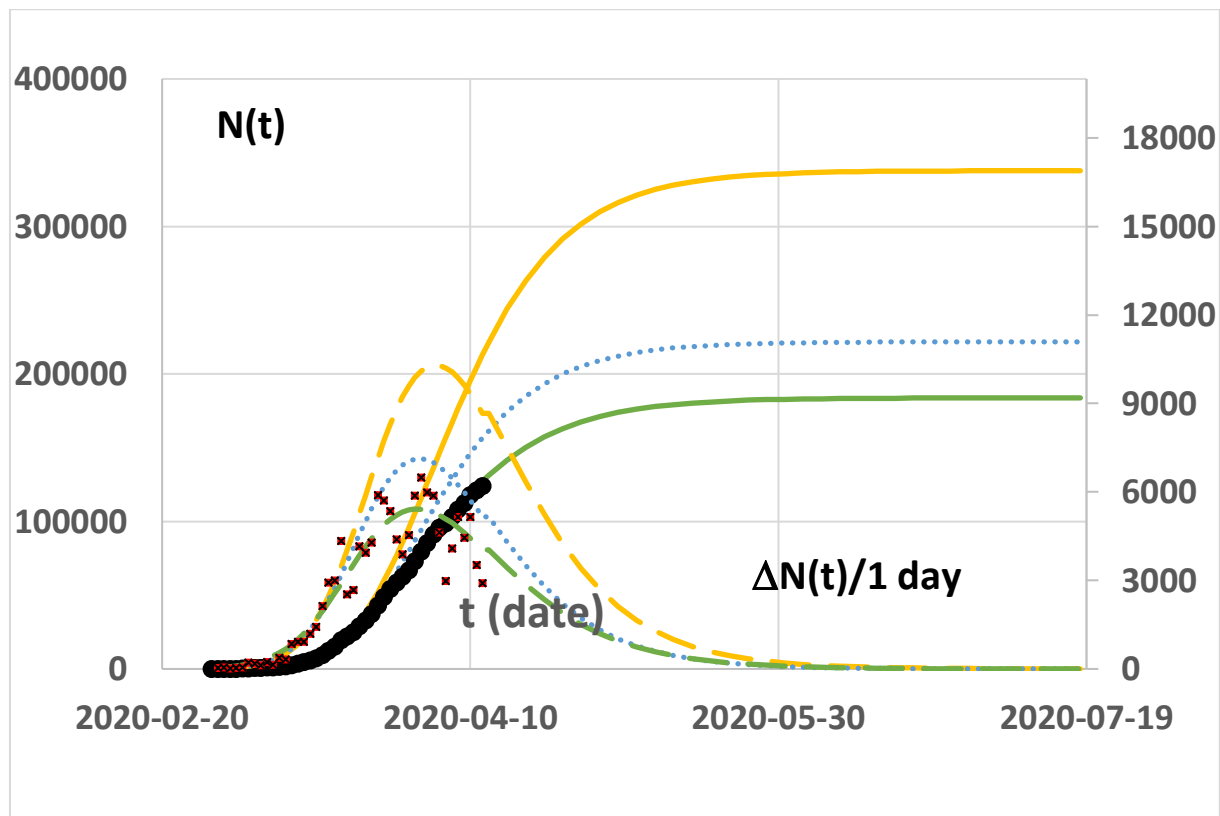

**Figure 1: Linear plot of confirmed total number of infections in Germany as a function of time.**

*Black circles*: Confirmed number of total infections [2] from February 28<sup>th</sup> till April 12<sup>th</sup> ,

*Full lines*: Fits and extrapolations according to the main text: *orange*: before contact lock (February 28<sup>th</sup> till March 21<sup>st</sup>), *green*: after contact lock (March 21<sup>st</sup> till April 12<sup>th</sup> )

*Dotted blue lines*: data for February 28<sup>th</sup> till March 23<sup>rd</sup> as used in [1] (cf. Table 1).

*Dark red rectangles*: Data for new infections from February 28<sup>th</sup> till April 12<sup>th</sup> . These data are differences between total infection data for two following days and are subjected to large statistical error.

*Dashed lines*: as full lines but for new infections. In spite of the large statistical error of the observed data, it is clearly seen that the green line is best consistent with them.

The linear plot (**Figure 2**) suggests that the infection rate decreases after April 10<sup>th</sup> which is consistent with the data observed so far. The extrapolation results in a decrease of the new infections to a negligible rate till end of May 2020. The time scale is not significantly shortened by the contact lock

(cf. dashed orange and green lines), but the finally attained total number of infections is reduced from 340 000 without to 180 000 with contact lock (full lines).

**Table 1: Fit parameters for three time intervals:** Fit parameters confirm the clear break of the total infection curve around the 21<sup>st</sup> of March under the effect of the contact lock in Germany. Initially published data till 23<sup>rd</sup> of March showed already a significant effect of the contact lock, but no clear distinction could be made at that time between data without and with contact lock.

|                                                             | Feb 28 <sup>th</sup> till March 21 <sup>st</sup><br>Before<br>Contact lock<br><i>orange,</i> | Feb 28 <sup>th</sup> till<br>March 23 <sup>rd</sup><br>[1]<br><i>blue</i> | March 21 <sup>st</sup> till April 12th<br>Contact lock<br><i>green</i> |
|-------------------------------------------------------------|----------------------------------------------------------------------------------------------|---------------------------------------------------------------------------|------------------------------------------------------------------------|
| Final total infections                                      | <b>338 000</b>                                                                               | 220 000                                                                   | <b>184 000</b>                                                         |
| Initial doubling time<br>$\tau_2/\text{days}$               | 2,7                                                                                          | 2,8                                                                       | 2,7                                                                    |
| Time parameter [1]<br>$\tau/\text{days}$<br>$\ln(N(t = 0))$ | 11,1<br>4,07                                                                                 | 10,6<br>4,01                                                              | 11,5<br>4,72                                                           |

## References:

[1] Extrapolation of Infection Data for the CoVid-19 Virus and Estimate of the Pandemic Time Scale,  
doi: <https://doi.org/10.1101/2020.03.26.20044081>

<https://www.medrxiv.org/content/10.1101/2020.03.26.20044081v1>

[2] <https://www.n-tv.de/infografik/Coronavirus-aktuelle-Zahlen-Daten-zur-Epidemie-in-Deutschland-Europa-und-der-Welt-article21604983.html>

looked up on April, 12<sup>th</sup> 2020
